# Supplementary material
Source: PubMed Central journal article supplement (PMC5442641)
Supplement: IAI.01054-16_zii999092048s1.pdf [file IAI.01054-16_zii999092048s1.pdf]

## Supplementary Figure Legends

**S1-a and b. Real time movies of cell-cell interactions in co-cultures of either *A. castellanii* Neff strain with murine BMD macrophages.** Murine macrophages were infected with trophozoites in a ratio 1:1 in  $\mu$ -slides. Images were acquired every 30 sec, for a period of 1 h using an inverted epifluorescence microscope.

**S2-a and b. Real time movies of cell-cell interactions in co-cultures of either *A. castellanii* clinical isolate strain trophozoites with murine BMD macrophages.** Murine macrophages were infected with trophozoites in a ratio 1:1 in  $\mu$ -slides. Images were acquired every 30 sec, for a period of 1 h using an inverted epifluorescence microscope.
